# Supplementary material for: Phyletic Profiling with Cliques of Orthologs Is Enhanced by Signatures of Paralogy Relationships
Source: PLoS Comput Biol. 2013 Jan 3;9(1):e1002852. doi: 10.1371/journal.pcbi.1002852 (PMC3536626; doi:10.1371/journal.pcbi.1002852)
Supplement: Table S1 — Results of the experimental assays. (XLSX) [file pcbi.1002852.s004.xlsx]

## Sheet: origData
Gene	Function	amp	amp	amp	amp	Amp_avg	kas	kas	kas	kas	Kas_avg	nal	nal	nal	nal	Nal_avg
MG1655	WT	0.11	0.105	0.094	0.088	0.09925	0.09	0.096	0.081	0.097	0.091	0.069	0.077	0.075	0.065	0.0715
dbpA	peptidoglycan-based cell wall biogenesis	0.0088	0.0074	0.0082	0.0076	0.008	0.0016	0.001	0.0009	0.0021	0.0014	0.068	0.072	0.077	0.064	0.07025
rhlB	peptidoglycan-based cell wall biogenesis	0.0085	0.0089	0.0072	0.0083	0.008225	0.1	0.11	0.091	0.088	0.09725	0.074	0.081	0.075	0.071	0.07525
yhbJ	peptidoglycan-based cell wall biogenesis	0.0046875	0.0033	0.0041	0.0038	0.00397188	0	0	0	0	0	0.071875	0.081	0.075	0.079	0.0767188
pmbA	peptidoglycan-based cell wall biogenesis	0.00515152	0.0047	0.0046	0.0055	0.00498788	0.102182	0.099	0.087	0.091	0.0947955	0.0424242	0.037	0.044	0.045	0.0421061
rhlE	peptidoglycan-based cell wall biogenesis	0.03125	0.051	0.044	0.046	0.0430625	0.1	0.091	0.095	0.11	0.099	0.11875	0.105	0.098	0.092	0.103437
tldD	peptidoglycan-based cell wall biogenesis	0.071	0.059	0.066	0.069	0.06625	0.112667	0.12	0.097	0.106	0.108917	0.0666667	0.069	0.065	0.061	0.0654167
yidD	peptidoglycan-based cell wall biogenesis	0.0645161	0.061	0.058	0.059	0.060629	0.0774194	0.075	0.068	0.071	0.0728548	0.0677419	0.061	0.059	0.055	0.0606855
ynbB	peptidoglycan-based cell wall biogenesis	0.00692308	0.0055	0.0061	0.0067	0.00630577	0.112	0.093	0.105	0.097	0.10175	0.0538462	0.051	0.055	0.049	0.0522115
envC	peptidoglycan-based cell wall biogenesis	0.00869565	0.0078	0.0069	0.0084	0.00794891	0.0782609	0.081	0.088	0.075	0.0805652	0.0565217	0.054	0.05	0.048	0.0521304
trmU (murE) (+ve cont)	peptidoglycan-based cell wall biogenesis	0.0044	0.0038	0.005	0.0036	0.0042	0.096	0.091	0.099	0.11	0.099	0.1	0.105	0.097	0.099	0.10025
yfiH	response to DNA damage stimulus	0.09375	0.087	0.083	0.102	0.0914375	0.0625	0.071	0.059	0.065	0.064375	0.0875	0.091	0.083	0.085	0.086625
ydcN	response to DNA damage stimulus	0.0857143	0.086	0.075	0.078	0.0811786	1.14286e-05	1e-05	2e-05	1e-05	1.28571e-05	0.00428571	0.0031	0.0045	0.0039	0.00394643
sbcC	response to DNA damage stimulus	0.0857143	0.079	0.081	0.077	0.0806786	0.1	0.096	0.088	0.091	0.09375	0.00392857	0.0028	0.0031	0.0035	0.00333214
nudG	response to DNA damage stimulus	0.0916667	0.0887	0.105	0.095	0.0950917	0.088	0.077	0.075	0.083	0.08075	0.00125	0.001	0.0019	0.0009	0.0012625
yhhT	response to DNA damage stimulus	0.0971429	0.0851	0.0911	0.089	0.0905857	0	0	0	0	0	0.02	0.018	0.025	0.027	0.0225
yajQ	response to DNA damage stimulus	0.0857143	0.0795	0.084	0.088	0.0843036	0.078	0.084	0.079	0.075	0.079	0.00714286	0.0066	0.0061	0.0072	0.00676071
proQ	response to DNA damage stimulus	0.0944444	0.087	0.096	0.11	0.0968611	0.166667	0.112	0.105	0.117	0.125167	0.00166667	0.0019	0.0022	0.0016	0.00184167
ybhQ	response to DNA damage stimulus	0.073	0.064	0.071	0.069	0.06925	0.06	0.071	0.068	0.063	0.0655	0.0233333	0.025	0.029	0.031	0.0270833
yfgI	response to DNA damage stimulus	0.075	0.076	0.063	0.079	0.07325	0.0933333	0.084	0.088	0.091	0.0890833	0.006	0.0054	0.0051	0.0048	0.005325
yaaY	response to DNA damage stimulus	0.0466667	0.048	0.051	0.055	0.0501667	0.088	0.081	0.079	0.082	0.0825	0.003	0.001	0.0025	0.0031	0.0024
recA (+ve cont)	response to DNA damage stimulus	0.091	0.089	0.11	0.105	0.09875	0.11	0.099	0.1	0.095	0.101	0.001	0.002	0.0015	0.0008	0.001325
hupA	translation	0.1	0.096	0.089	0.11	0.09875	0.0173333	0.023	0.016	0.024	0.0200833	0.08	0.088	0.074	0.081	0.08075
hupB	translation	0.1	0.12	0.091	0.079	0.0975	0.016	0.023	0.025	0.019	0.02075	0.00233333	0.0031	0.0029	0.0026	0.00273333
frvX	translation	0.0704545	0.07	0.065	0.0715	0.0692386	0	0	0	0	0	0.00363636	0.003	0.0024	0.0032	0.00305909
ybaB	translation	0.0807692	0.086	0.074	0.071	0.0779423	0.000230769	0.00019	0.00031	0.00026	0.000247692	0.0853846	0.079	0.081	0.084	0.0823462
ypdE	translation	0.0875	0.082	0.077	0.083	0.082375	0.00208333	0.0025	0.0019	0.0022	0.00217083	0.125	0.114	0.097	0.105	0.11025
ychF	translation	0.0851852	0.079	0.088	0.092	0.0860463	0.00037037	0.00028	0.00027	0.00036	0.000320093	0.0555556	0.061	0.052	0.057	0.0563889
rmuC	translation	0.0612903	0.0712	0.0654	0.0623	0.0650476	3.87097e-05	2e-05	1.5e-05	3e-05	2.59274e-05	0.0709677	0.067	0.076	0.065	0.0697419
smpB	translation	0.0612903	0.065	0.071	0.063	0.0650726	3.22581e-05	2e-05	1e-05	1e-05	1.80645e-05	0.0419355	0.046	0.042	0.047	0.0442339
ycfH	translation	0.0916667	0.11	0.0971	0.0895	0.0970667	4.91667e-05	4e-05	4e-05	3e-05	3.97917e-05	0.0625	0.066	0.063	0.059	0.062625
yjjV	translation	0.0375	0.041	0.045	0.039	0.040625	0	0	0	0	0	0.09375	0.096	0.1	0.099	0.0971875
tatD	translation	0.0628571	0.064	0.081	0.077	0.0712143	0	0	0	0	0	0.0428571	0.054	0.049	0.044	0.0474643
sgcX	translation	0.06	0.068	0.056	0.064	0.062	0	0	0	0	0	0.0333333	0.042	0.039	0.036	0.0375833
tig (+ve cont)	translation	0.105	0.095	0.097	0.1	0.09925	0.0015	0.002	0.001	0.0009	0.00135	0.11	0.105	0.097	0.099	0.10275
yebC	response to DNA damage stimulus, translation	0.0857143	0.088	0.076	0.091	0.0851786	0	0	0	0	0	0.00285714	0.0019	0.0021	0.0025	0.00233929
yeeN	response to DNA damage stimulus, translation	0.09	0.088	0.076	0.092	0.0865	0.0001	0.0002	0.00015	0.0003	0.0001875	0.0012	0.001	0.0015	0.0017	0.00135
mraZ	response to DNA damage stimulus, translation	0.0533333	0.044	0.052	0.054	0.0508333	0	0	0	0	0	0.00833333	0.008	0.0075	0.0074	0.00780833
yajC	response to DNA damage stimulus, translation	0.0526316	0.055	0.049	0.047	0.0509079	2.10526e-05	1e-05	3e-05	1e-05	1.77632e-05	0.0894737	0.087	0.078	0.0834	0.0844684
yfjD	response to DNA damage stimulus, translation	0.088	0.079	0.085	0.081	0.08325	0.00012	0.00022	0.00018	0.00016	0.00017	0	0	0	0	0
ytfL	response to DNA damage stimulus, translation	0.1	0.103	0.097	0.089	0.09725	0	0	0	0	0	0.00266667	0.0019	0.0025	0.0018	0.00221667
ybeB	peptidoglycan-based cell wall biogenesis, translation	0.005	0.0038	0.0044	0.0051	0.004575	0	0	0	0	0	0.04	0.037	0.041	0.045	0.04075

## Sheet: normToWt
Gene	Function	amp	amp	amp	amp	Amp_avg	95% CI	t-test	kas	kas	kas	kas	Kas_avg	95% CI	t-test	nal	nal	nal	nal	Nal_avg	95% CI	t-test	precision	prec2	correct? criteria to the right -->	low threshold	high threshold
MG1655	WT	1.10831	1.05793	0.947103	0.88665	1	0.0991903	NA	0.989011	1.05495	0.89011	1.06593	1	0.0791359	NA	0.965035	1.07692	1.04895	0.909091	1	0.075487	NA			NA	0.25	0.5
dbpA	peptidoglycan-based cell wall biogenesis	0.088665	0.0745592	0.0826196	0.0765743	0.0806045	0.00624479	0.00017452	0.0175824	0.010989	0.00989011	0.0230769	0.0153846	0.00602809	7.04099e-05	0.951049	1.00699	1.07692	0.895105	0.982517	0.0762094	0.380112	0.6816	NA	0
rhlB	peptidoglycan-based cell wall biogenesis	0.0856423	0.0896725	0.0725441	0.0836272	0.0828715	0.00718264	0.000173486	1.0989	1.20879	1	0.967033	1.06868	0.106744	0.176635	1.03497	1.13287	1.04895	0.993007	1.05245	0.0574728	0.161502	0.6659	NA	1		num total
yhbJ	peptidoglycan-based cell wall biogenesis	0.0472292	0.0332494	0.0413098	0.0382872	0.0400189	0.00572768	0.000154327	0	0	0	0	0	NA	7.21563e-05	1.00524	1.13287	1.04895	1.1049	1.07299	0.0559263	0.0913871	0.7977	NA	0		38
pmbA	peptidoglycan-based cell wall biogenesis	0.0519044	0.0473552	0.0463476	0.0554156	0.0502557	0.00412018	0.000162128	1.12288	1.08791	0.956044	1	1.04171	0.0754886	0.241551	0.593346	0.517483	0.615385	0.629371	0.588896	0.0488667	0.00012519	0.762	NA	1
rhlE	peptidoglycan-based cell wall biogenesis	0.314861	0.513854	0.443325	0.463476	0.433879	0.0830124	8.12143e-05	1.0989	1	1.04396	1.20879	1.08791	0.0883673	0.0985709	1.66084	1.46853	1.37063	1.28671	1.44668	0.157728	0.00306712	0.6721	NA	0		num correct
tldD	peptidoglycan-based cell wall biogenesis	0.715365	0.594458	0.664987	0.695214	0.667506	0.0518574	0.00146488	1.2381	1.31868	1.06593	1.16484	1.19689	0.105408	0.0143962	0.932401	0.965035	0.909091	0.853147	0.914918	0.0461979	0.0592873	0.762	NA	0		25
yidD	peptidoglycan-based cell wall biogenesis	0.650037	0.61461	0.584383	0.594458	0.610872	0.0283964	0.00150067	0.850762	0.824176	0.747253	0.78022	0.800603	0.0450271	0.00434235	0.94744	0.853147	0.825175	0.769231	0.848748	0.0729809	0.0151284	0.8788	NA	0
ynbB	peptidoglycan-based cell wall biogenesis	0.0697539	0.0554156	0.061461	0.0675063	0.0635342	0.00631746	0.000164981	1.23077	1.02198	1.15385	1.06593	1.11813	0.0911135	0.0522123	0.753093	0.713287	0.769231	0.685315	0.730231	0.0373091	0.00120184	0.7606	NA	1
envC	peptidoglycan-based cell wall biogenesis	0.0876136	0.0785894	0.0695214	0.0846348	0.0800898	0.00782364	0.000170167	0.86001	0.89011	0.967033	0.824176	0.885332	0.059554	0.0335439	0.790514	0.755245	0.699301	0.671329	0.729097	0.0527152	0.00087107	0.7111	NA	1
trmU (murE) (+ve cont)	peptidoglycan-based cell wall biogenesis	0.0443325	0.0382872	0.0503778	0.036272	0.0423174	0.00624479	0.000154398	1.05495	1	1.08791	1.20879	1.08791	0.0865998	0.0963341	1.3986	1.46853	1.35664	1.38462	1.4021	0.0466475	0.000150597
yfiH	response to DNA damage stimulus	0.944584	0.876574	0.836272	1.02771	0.921285	0.0821763	0.138834	0.686813	0.78022	0.648352	0.714286	0.707418	0.0544476	0.000760859	1.22378	1.27273	1.16084	1.18881	1.21154	0.0472726	0.00272414	0.6933	NA	0
ydcN	response to DNA damage stimulus	0.86362	0.866499	0.755668	0.785894	0.81792	0.0547078	0.0139279	0.000125589	0.00010989	0.00021978	0.00010989	0.000141287	5.17914e-05	7.21864e-05	0.0599401	0.0433566	0.0629371	0.0545455	0.0551948	0.00844954	6.3724e-05	0.648	NA	0
sbcC	response to DNA damage stimulus	0.86362	0.79597	0.816121	0.775819	0.812882	0.0368615	0.0138626	1.0989	1.05495	0.967033	1	1.03022	0.0572382	0.284266	0.0549451	0.0391608	0.0433566	0.048951	0.0466034	0.00671908	6.55667e-05	0.9121	NA	1
nudG	response to DNA damage stimulus	0.923594	0.893703	1.05793	0.957179	0.958102	0.0699972	0.263348	0.967033	0.846154	0.824176	0.912088	0.887363	0.0636346	0.0373712	0.0174825	0.013986	0.0265734	0.0125874	0.0176573	0.00616455	6.08155e-05	0.8873	NA	1
yhhT	response to DNA damage stimulus	0.978769	0.857431	0.917884	0.896725	0.912702	0.0496543	0.0955945	0	0	0	0	0	NA	7.21563e-05	0.27972	0.251748	0.34965	0.377622	0.314685	0.0576089	6.67151e-06	0.7192	NA	0
yajQ	response to DNA damage stimulus	0.86362	0.801008	0.846348	0.88665	0.849406	0.0355186	0.0261754	0.857143	0.923077	0.868132	0.824176	0.868132	0.040294	0.0191498	0.0999001	0.0923077	0.0853147	0.100699	0.0945554	0.00708386	7.58788e-05	0.7117	NA	1
proQ	response to DNA damage stimulus	0.951581	0.876574	0.967254	1.10831	0.975931	0.0947847	0.371356	1.8315	1.23077	1.15385	1.28571	1.37546	0.302621	0.0448129	0.02331	0.0265734	0.0307692	0.0223776	0.0257576	0.00371864	6.57292e-05	0.6476	NA	1
ybhQ	response to DNA damage stimulus	0.735516	0.644836	0.715365	0.695214	0.697733	0.038135	0.00280053	0.659341	0.78022	0.747253	0.692308	0.71978	0.0531224	0.000941246	0.32634	0.34965	0.405594	0.433566	0.378788	0.0484043	1.66193e-05	0.6176	NA	0
yfgI	response to DNA damage stimulus	0.755668	0.765743	0.634761	0.79597	0.738035	0.0695273	0.00348433	1.02564	0.923077	0.967033	1	0.978938	0.0434114	0.33398	0.0839161	0.0755245	0.0713287	0.0671329	0.0744755	0.00702226	7.11154e-05	0.6192	NA	1
yaaY	response to DNA damage stimulus	0.470193	0.483627	0.513854	0.554156	0.505458	0.0365022	0.000498986	0.967033	0.89011	0.868132	0.901099	0.906593	0.0417083	0.0508364	0.041958	0.013986	0.034965	0.0433566	0.0335664	0.0132885	4.75198e-05	0.7551	NA	1
recA (+ve cont)	response to DNA damage stimulus	0.916877	0.896725	1.10831	1.05793	0.994962	0.102096	0.473477	1.20879	1.08791	1.0989	1.04396	1.10989	0.0686746	0.0432556	0.013986	0.027972	0.020979	0.0111888	0.0185315	0.00737032	5.88512e-05
hupA	translation	1.00756	0.967254	0.896725	1.10831	0.994962	0.086596	0.471352	0.190476	0.252747	0.175824	0.263736	0.220696	0.0431135	1.19184e-05	1.11888	1.23077	1.03497	1.13287	1.12937	0.0786357	0.02951	0.8633	NA	1
hupB	translation	1.00756	1.20907	0.916877	0.79597	0.982368	0.170735	0.434091	0.175824	0.252747	0.274725	0.208791	0.228022	0.0434114	1.21464e-05	0.032634	0.0433566	0.0405594	0.0363636	0.0382284	0.00461414	6.72264e-05	0.9012	NA	0
frvX	translation	0.709869	0.70529	0.654912	0.720403	0.697619	0.0285819	0.00341032	0	0	0	0	0	NA	7.21563e-05	0.0508582	0.041958	0.0335664	0.0447552	0.0427845	0.00703781	6.4168e-05	0.598	NA	0
ybaB	translation	0.813796	0.866499	0.745592	0.715365	0.785313	0.0666408	0.00779307	0.00253593	0.00208791	0.00340659	0.00285714	0.00272189	0.000543757	7.27041e-05	1.19419	1.1049	1.13287	1.17483	1.15169	0.0395472	0.010268	0.7879	NA	1
ypdE	translation	0.881612	0.826196	0.775819	0.836272	0.829975	0.0425408	0.0179231	0.0228938	0.0274725	0.0208791	0.0241758	0.0238553	0.00271163	7.64529e-05	1.74825	1.59441	1.35664	1.46853	1.54196	0.164995	0.00181732	0.6444	NA	1
ychF	translation	0.858289	0.79597	0.88665	0.926952	0.866965	0.0539778	0.0365663	0.00407	0.00307692	0.00296703	0.00395604	0.0035175	0.000564293	7.28745e-05	0.777001	0.853147	0.727273	0.797203	0.788656	0.051034	0.00269872	1	NA	1
rmuC	translation	0.617535	0.71738	0.658942	0.627708	0.655391	0.0440256	0.00151495	0.000425381	0.00021978	0.000164835	0.00032967	0.000284917	0.000113717	7.22159e-05	0.992556	0.937063	1.06294	0.909091	0.975412	0.0665226	0.324587	0.6186	NA	1
smpB	translation	0.617535	0.654912	0.715365	0.634761	0.655643	0.0417906	0.00160635	0.000354484	0.00021978	0.00010989	0.00010989	0.000198511	0.000113846	7.21973e-05	0.58651	0.643357	0.587413	0.657343	0.618656	0.0363003	0.000304998	1	NA	1
ycfH	translation	0.923594	1.10831	0.978338	0.901763	0.978002	0.0907979	0.379723	0.000540293	0.00043956	0.00043956	0.00032967	0.000437271	8.43049e-05	7.22497e-05	0.874126	0.923077	0.881119	0.825175	0.875874	0.0393179	0.0199543	0.9721	NA	1
yjjV	translation	0.377834	0.413098	0.453401	0.392947	0.40932	0.0320901	0.000315482	0	0	0	0	0	NA	7.21563e-05	1.31119	1.34266	1.3986	1.38462	1.35927	0.0391058	0.000342639	0.9722	NA	0
tatD	translation	0.633321	0.644836	0.816121	0.775819	0.717524	0.0903378	0.00314308	0	0	0	0	0	NA	7.21563e-05	0.599401	0.755245	0.685315	0.615385	0.663836	0.0700221	0.000350785	0.9368	NA	1
sgcX	translation	0.604534	0.685139	0.564232	0.644836	0.624685	0.0509885	0.000908481	0	0	0	0	0	NA	7.21563e-05	0.4662	0.587413	0.545455	0.503497	0.525641	0.0513342	5.66208e-05	0.5976	NA	1
tig (+ve cont)	translation	1.05793	0.957179	0.97733	1.00756	1	0.0429447	0.5	0.0164835	0.021978	0.010989	0.00989011	0.0148352	0.00545584	7.11956e-05	1.53846	1.46853	1.35664	1.38462	1.43706	0.0809894	0.000125352	DNAdmg	transl
yebC	response to DNA damage stimulus, translation	0.86362	0.88665	0.765743	0.916877	0.858222	0.0640871	0.0319912	0	0	0	0	0	NA	7.21563e-05	0.03996	0.0265734	0.0293706	0.034965	0.0327173	0.00583774	6.42722e-05	0.9895	0.6248	1
yeeN	response to DNA damage stimulus, translation	0.906801	0.88665	0.765743	0.926952	0.871537	0.0709729	0.0447117	0.0010989	0.0021978	0.00164835	0.0032967	0.00206044	0.000919581	7.24817e-05	0.0167832	0.013986	0.020979	0.0237762	0.0188811	0.00426138	6.37484e-05	0.9894	0.6631	1
mraZ	response to DNA damage stimulus, translation	0.537364	0.443325	0.523929	0.544081	0.512175	0.0457241	0.000367152	0	0	0	0	0	NA	7.21563e-05	0.11655	0.111888	0.104895	0.103497	0.109207	0.00599612	8.21274e-05	0.595	0.8134	1
yajC	response to DNA damage stimulus, translation	0.530293	0.554156	0.493703	0.473552	0.512926	0.0354306	0.000549458	0.000231348	0.00010989	0.00032967	0.00010989	0.0001952	0.000104242	7.21969e-05	1.25138	1.21678	1.09091	1.16643	1.18138	0.0682755	0.00657649	0.5995	0.6861	0
yfjD	response to DNA damage stimulus, translation	0.88665	0.79597	0.856423	0.816121	0.838791	0.0398029	0.0212387	0.00131868	0.00241758	0.00197802	0.00175824	0.00186813	0.000448351	7.25319e-05	0	0	0	0	0	NA	6.26612e-05	0.9233	0.6922	1
ytfL	response to DNA damage stimulus, translation	1.00756	1.03778	0.97733	0.896725	0.979849	0.0594486	0.373417	0	0	0	0	0	NA	7.21563e-05	0.037296	0.0265734	0.034965	0.0251748	0.0310023	0.00590404	6.3821e-05	0.9792	0.6458	1
no cont																							cellWall	transl
ybeB	peptidoglycan-based cell wall biogenesis, translation	0.0503778	0.0382872	0.0443325	0.0513854	0.0460957	0.00594486	0.000156863	0	0	0	0	0	NA	7.21563e-05	0.559441	0.517483	0.573427	0.629371	0.56993	0.0452853	0.000115893	0.641	0.6311	1
																								average predicted Precision	0.754605
